# Supplementary material for: The Host Response to Viral Infections Reveals Common and Virus-Specific Signatures in the Peripheral Blood
Source: Front Immunol. 2021 Oct 27;12:741837. doi: 10.3389/fimmu.2021.741837 (PMC8578928; doi:10.3389/fimmu.2021.741837)
Supplement: Supplementary file 7 [file Table_6.csv]

ENSEMBL_gene_ID	entrezgene_id	uniprotswissprot	refseq_mrna	DU16.02S0003354	DU16.02S0003360
ENSG00000140526	11057	P08910	NM_152924	15.23187	13.92135
ENSG00000089127	4938	P00973	NM_016816	15.44815	16.55944
ENSG00000179094	5187	O15534	NM_002616	12.97302	13.14401
ENSG00000107796	59	P62736	NM_001320855	11.61998	11.7836
ENSG00000131355	84658	NA	NM_001289159	14.04098	12.72333
ENSG00000282608	140	P0DMS8	NM_000677	9.062289	8.66475
ENSG00000188157	375790	O00468	NM_198576	11.51718	12.08275
ENSG00000179593	247	O15296	NM_001141	7.808418	9.326164
ENSG00000162551	249	P05186	NM_000478	16.4270789468442	14.7224864438243
ENSG00000116337	271	Q01433	NM_139156	15.38619	14.69331
ENSG00000128394	200316	Q8IUX4	NM_145298	12.25273	13.04889
ENSG00000109321	374	P15514	NM_001657	6.895622	6.225413
ENSG00000118520	383	P05089	NM_000045	11.5194	11.21103
ENSG00000198363	444	Q12797	NM_004318	12.57948	10.84169
ENSG00000162772	467	P18847	NM_001674	9.83342962962634	9.86349813459246
ENSG00000169136	22809	Q9Y2D1	NM_012068	11.97645	13.66709
ENSG00000167601	558	P30530	NM_021913	6.668256	8.3063
ENSG00000007516	8938	O94812	NM_001199097	12.63584	11.75127
ENSG00000168062	116071	Q8N1L9	NM_138456	12.1586	13.28715
ENSG00000121380	79370	Q9BZR8	NM_138723	6.049447	7.858151
ENSG00000106605	644	P53004	NM_000712	12.89536	13.14763
ENSG00000139618	675	P51587	NM_000059	10.20596	10.36263
ENSG00000130303	684	Q10589	NM_004335	14.35811	16.27774
ENSG00000173372	712	P02745	NM_001347465	11.69088	11.82991
ENSG00000173369	713	P02746	NM_000491	11.74413	12.22302
ENSG00000159189	714	P02747	NM_001347620	10.5197921067214	11.5670398184748
ENSG00000166278	717	NA	NM_001282457	10.26053	11.152
ENSG00000123838	722	P04003	NM_000715	6.544986	7.492356
ENSG00000167434	762	P22748	NM_000717	11.25498	11.20613
ENSG00000141837	773	O00555	NM_001127222	9.745671	10.54036
ENSG00000188820	441168	Q5R3K3	NM_001276460	12.28773	12.64586
ENSG00000183049	57118	Q8IU85	NM_153498	13.71783	12.70943
ENSG00000255221	440068	Q5XLA6	NM_001007232	9.736018	10.32642
ENSG00000087589	57091	Q9NQ75	NM_001164116	12.0183	10.11689
ENSG00000159228	873	P16152	NM_001286789	12.239947466279	13.2192390478783
ENSG00000108691	6347	P13500	NM_002982	6.659457	6.62514
ENSG00000108700	6355	P80075	NM_005623	5.672271	5.629373
ENSG00000135083	79616	Q8IV13	NM_024565	12.40342	11.52888
ENSG00000121797	9034	O00421	NM_003965	10.47571	11.79507
ENSG00000204936	57126	NA	NM_020406	12.47458	11.47223
ENSG00000186407	342510	Q496F6	NM_181449	14.8466	14.24384
ENSG00000204345	100131439	Q6UXZ3	NM_001115152	6.625991	6.342456
ENSG00000146670	113130	Q96FF9	NM_080668	10.49659	12.36243
ENSG00000117266	5129	Q07002	NM_212503	9.750538	10.64758
ENSG00000176749	8851	Q15078	NM_003885	10.48715	9.443254
ENSG00000124762	1026	P38936	NM_000389	12.81555	14.53864
ENSG00000129757	1028	P49918	NM_001362474	12.24197	10.68168
ENSG00000198848	1066	P23141	NM_001025195	11.96767	13.39648
ENSG00000213085	25790	Q9UL16	NM_012337	8.854524	7.809096
ENSG00000103121	56942	Q9NRP2	NM_001351973	11.24389	12.26249
ENSG00000173786	1267	P09543	NM_033133	13.88964	15.0481
ENSG00000106714	79937	Q9BZ76	NM_033655	11.2743	7.539892
ENSG00000154529	728577	Q96NU0	NM_001201380	10.89659	4.421958
ENSG00000145244	10699	Q9Y5Q5	NM_006587	7.710063	5.487458
ENSG00000203710	1378	P17927	NM_000573	14.64145	13.14318
ENSG00000135047	1514	P07711	NM_001257971	10.98578	12.10445
ENSG00000169245	3627	P02778	NM_001565	8.059087	9.666873
ENSG00000071967	79901	Q53TN4	NM_001256909	12.27833	9.989392
ENSG00000276644	1602	Q9UI36	NM_080759	9.183767	7.736806
ENSG00000164825	1672	P60022	NM_005218	5.35064	6.222806
ENSG00000062282	84649	Q96PD7	NM_032564	14.45459	13.80928
ENSG00000108771	79132	Q96C10	NM_024119	13.27636	13.82519
ENSG00000126787	9787	Q15398	NM_001146015	9.795488	11.13509
ENSG00000125170	55715	NA	NM_001330556	8.354607	9.489415
ENSG00000141096	64180	Q9H4B8	NM_001129758	11.28868	10.07346
ENSG00000134755	1824	Q02487	NM_024422	11.32593	8.908364
ENSG00000143476	51514	Q9NZJ0	NM_016448	9.713798	11.21532
ENSG00000120129	1843	P28562	NM_004417	14.96916	14.83091
ENSG00000138166	1847	Q16690	NM_004419	12.22337	14.65976
ENSG00000134463	79746	Q96DC8	NM_024693	9.989171	9.852965
ENSG00000119915	83401	Q9HB03	NM_152310	7.569305	8.223922
ENSG00000054179	954	Q9Y5L3	NM_203468	7.006187	6.343504
ENSG00000133216	2048	P29323	NM_017449	11.45976	11.69047
ENSG00000133106	94240	Q96J88	NM_001002264	14.31164	15.22941
ENSG00000010030	51513	Q9Y603	NM_001207035	10.40726	12.44589
ENSG00000179044	283849	Q86VI1	NM_178516	10.65356	10.69486
ENSG00000177294	162517	Q8N4B4	NM_153230	7.100981	8.948059
ENSG00000004478	2288	Q02790	NM_002014	12.50904	13.88877
ENSG00000096060	2289	Q13451	NM_004117	14.3997	14.43539
ENSG00000175592	8061	P15407	NM_001300857	8.44966	8.379328
ENSG00000116717	1647	P24522	NM_001924	10.30047	10.40634
ENSG00000143891	130589	Q96C23	NM_138801	12.58933	13.55004
ENSG00000183087	2621	Q14393	NM_000820	12.36153	13.93371
ENSG00000162654	115361	Q96PP9	NM_052941	14.2203246690216	14.2947275714804
ENSG00000099998	2687	P36269	NM_001302465	8.927434	6.226376
ENSG00000131153	51659	Q9Y248	NM_016095	10.36441	11.67493
ENSG00000179921	151306	Q8TDU6	NM_001321950	13.26339	13.64528
ENSG00000023171	57476	NA	NM_001330396	12.29893	12.05073
ENSG00000178075	54762	Q8IYS0	NM_017577	8.401283	6.593307
ENSG00000106070	2887	Q13322	NM_001001555	11.181	10.45315
ENSG00000105464	2906	O15399	NM_000836	8.486236	9.628197
ENSG00000198785	116443	Q8TCU5	NM_133445	8.618119	8.786868
ENSG00000140287	3067	P19113	NM_002112	9.14302	8.965291
ENSG00000138642	55008	Q8IVU3	NM_001165136	12.29091	12.97258
ENSG00000188290	57801	NA	NM_001142467	11.63259	11.66078
ENSG00000163666	8820	Q9UBX0	NM_003865	6.711688	7.55768
ENSG00000164120	3248	P15428	NM_000860	8.422804	7.508554
ENSG00000106211	3315	P04792	NM_001540	13.42094	14.67582
ENSG00000260325	94086	Q9BQS6	NM_033194	7.377496	5.88575
ENSG00000165949	3429	P40305	NM_001288960	12.67097	17.77282
ENSG00000137959	10964	Q53G44	NM_006820	14.09144	15.45689
ENSG00000115267	64135	Q9BYX4	NM_022168	13.13581	13.52359
ENSG00000185745	3434	P09914	NM_001548	14.51426	15.71132
ENSG00000119917	3437	O14879	NM_001549	15.45362	16.61375
ENSG00000140443	3480	P08069	NM_000875	13.89952	11.81727
ENSG00000115594	3554	NA	NM_001288706	12.30562	10.40491
ENSG00000115590	7850	P27930	NM_004633	13.57733	13.50395
ENSG00000196083	3556	Q9NPH3	NM_001167929	11.62226	10.20487
ENSG00000115602	9173	Q01638	NM_016232	8.817567	6.099437
ENSG00000136689	3557	P18510	NM_001318914	14.81007	14.97158
ENSG00000104951	259307	Q96RQ9	NM_152899	9.202308	9.393145
ENSG00000091181	3568	Q01344	NM_175726	10.72898	9.762958
ENSG00000163083	3625	P09529	NM_002193	7.892665	6.391521
ENSG00000197852	55924	Q9NTI7	NM_198926	14.34733	13.53216
ENSG00000090376	11213	Q9Y616	NM_007199	14.62599	12.6897
ENSG00000185507	3665	Q92985	NM_004029	15.63128	17.29685
ENSG00000185950	8660	Q9Y4H2	NM_003749	13.22465	11.35378
ENSG00000187608	9636	P05161	NM_005101	15.09143	17.26806
ENSG00000159556	64843	Q96A47	NM_145805	10.3407274394205	8.95000297590499
ENSG00000132470	3691	P16144	NM_001321123	10.90973	8.723241
ENSG00000092051	84502	Q96JJ6	NM_001146028	8.59418	8.957783
ENSG00000173801	3728	P14923	NM_001352774	12.65149	13.90009
ENSG00000189337	23254	Q674X7	NM_201628	10.2298	8.803995
ENSG00000120696	84078	Q8WVZ9	NM_032138	10.30242	9.56967
ENSG00000180509	3753	P15382	NM_001127669	11.05598	10.70604
ENSG00000135519	23416	Q9ULD8	NM_012284	12.36797	10.7895
ENSG00000151364	65987	Q9BQ13	NM_023930	6.108767	9.928162
ENSG00000196123	653319	Q68EN5	NM_001040715	11.49784	11.9389
ENSG00000114656	57501	NA	NM_001348521	9.816255	8.541566
ENSG00000165115	55582	Q86VH2	NM_001354070	9.589836	8.585
ENSG00000130487	113730	NA	NM_138433	11.66755	12.47596
ENSG00000185909	200942	Q8IXV7	NM_173546	11.845	12.95348
ENSG00000109466	11275	O95198	NM_007246	12.21292	10.82016
ENSG00000183762	83999	Q96MU8	NM_001039570	13.20469	11.37322
ENSG00000089692	3902	P18627	NM_002286	12.77554	13.53915
ENSG00000078081	27074	Q9UQV4	NM_014398	10.02037	10.70405
ENSG00000002549	51056	P28838	NM_015907	14.22091	15.06629
ENSG00000108679	3959	Q08380	NM_005567	13.90572	15.38017
ENSG00000128342	3976	P15018	NM_002309	6.211603	7.570265
ENSG00000160932	4061	Q16553	NM_002346	16.7310961557855	18.2852447592834
ENSG00000111837	4117	P20794	NM_005906	10.50844	8.271339
ENSG00000110492	4192	P21741	NM_001270550	9.775819	11.286
ENSG00000170439	196410	Q6UX53	NM_152637	8.712179	11.10604
ENSG00000257335	8972	O43451	NM_004668	15.63405	14.32874
ENSG00000196549	4311	P08473	NM_001354642	14.42104	13.43491
ENSG00000155363	4343	Q9HCE1	NM_020963	14.53489	14.92387
ENSG00000197965	9019	O95297	NM_003953	13.65146	13.35055
ENSG00000110079	51338	Q96JQ5	NM_001243266	11.0327	10.77558
ENSG00000169715	4493	P04732	NM_175617	9.027465	9.998871
ENSG00000125148	4502	P02795	NM_005953	14.08329	15.33934
ENSG00000157601	4599	P20591	NM_001144925	16.1004991643849	17.8633903274176
ENSG00000109805	64151	Q9BPX3	NM_022346	10.32185	12.4263
ENSG00000111912	135112	Q8NI08	NM_001199620	11.94216	11.98765
ENSG00000078114	10529	O76041	NM_006393	5.594858	6.40115
ENSG00000103154	54550	Q7Z6G3	NM_019065	10.18373	9.119556
ENSG00000162614	91624	Q0ZGT2	NM_144573	10.1109637019462	10.1621197471319
ENSG00000170448	152518	Q6ZNB6	NM_152995	11.57452	9.905262
ENSG00000148200	2649	Q15406	NM_033334	10.45761	9.389602
ENSG00000179299	79730	Q8NE18	NM_024677	9.99243	8.90673
ENSG00000111335	4939	P29728	NM_016817	15.55209	16.63431
ENSG00000111331	4940	Q9Y6K5	NM_006187	15.68387	16.07866
ENSG00000135114	8638	Q15646	NM_003733	14.3169	15.35546
ENSG00000178814	26873	O14841	NM_017570	11.6953	11.14648
ENSG00000115155	9381	Q9HC10	NM_004802	11.13055	13.1811
ENSG00000115507	5013	P32242	NM_001199770	7.979583	7.166787
ENSG00000171631	5031	Q15077	NM_001277207	10.01551	11.91558
ENSG00000183570	54039	P57721	NM_001348240	7.738286	8.630269
ENSG00000165650	118987	Q8NEN9	NM_173791	12.17605	10.89727
ENSG00000123836	5208	O60825	NM_006212	11.13285	10.08871
ENSG00000197121	80055	Q75T13	NM_001321100	8.407432	7.241834
ENSG00000008438	8993	O75594	NM_005091	13.35229	12.83514
ENSG00000122733	23349	Q9UPV7	NM_001347982	6.242533	5.200848
ENSG00000181649	7262	Q53GA4	NM_003311	6.092507	7.186517
ENSG00000173868	162466	Q8TCT1	NM_178500	15.02487	14.41642
ENSG00000124102	5266	P19957	NM_002638	14.90157	10.41635
ENSG00000057294	5318	Q99959	NM_001005242	6.233456	5.99838
ENSG00000145287	51316	Q9NZF1	NM_016619	14.52967	15.32686
ENSG00000163803	151056	Q6P1J6	NM_153021	13.35307	11.52187
ENSG00000214456	440503	Q00G26	NM_001013706	11.86658	11.29371
ENSG00000060656	10076	Q92729	NM_005704	6.263398	8.202648
ENSG00000155893	92370	Q8TE99	NM_001037172	11.02025	9.562025
ENSG00000100504	5836	P06737	NM_001163940	15.63835	14.76501
ENSG00000100228	9609	O95755	NM_001349877	9.502277	9.544928
ENSG00000181826	768211	Q8IUW5	NM_001085399	11.21751	10.0631
ENSG00000183688	359845	Q8N5W9	NM_182705	14.03937	12.85829
ENSG00000087903	5990	P48378	NM_000635	12.68583	11.12761
ENSG00000132669	54453	Q8WYP3	NM_018993	11.67436	10.73657
ENSG00000175643	116028	Q96E14	NM_152308	9.658346	11.10469
ENSG00000129538	6035	P07998	NM_002933	9.957013	11.92889
ENSG00000171848	6241	P31350	NM_001034	11.3585	13.3786
ENSG00000134321	91543	Q8WXG1	NM_080657	14.06993	15.01972
ENSG00000100218	27156	Q9UHP6	NM_014433	7.884047	5.758492
ENSG00000136514	64108	Q96DX8	NM_022147	11.72153	12.37219
ENSG00000188282	285180	Q6ZNE9	NM_198483	10.97142	11.45901
ENSG00000020577	23034	Q9UPU9	NM_001161576	10.14882	10.00317
ENSG00000155307	64092	Q9NSI8	NM_022136	12.3867	11.84581
ENSG00000169439	6383	P34741	NM_002998	7.232911	5.388754
ENSG00000162512	9672	O75056	NM_014654	11.0752634426522	11.2720628068566
ENSG00000139410	113675	Q96GA7	NM_001304993	8.885172	10.30744
ENSG00000108387	5414	O43236	NM_001368772	11.12582	11.83198
ENSG00000149131	710	P05155	NM_000062	14.53962	15.82301
ENSG00000164023	166929	Q8NHU3	NM_001136258	10.69095	8.696704
ENSG00000088827	6614	Q9BZZ2	NM_023068	14.05883	15.63594
ENSG00000018280	6556	P49279	NM_000578	17.79841	16.76984
ENSG00000221955	84561	A0AV02	NM_001195483	6.33798	8.661538
ENSG00000124107	6590	P03973	NM_003064	13.30638	11.57227
ENSG00000214872	219537	NA	NM_001105565	8.034095	7.345034
ENSG00000137642	6653	Q92673	NM_003105	17.34371	15.47607
ENSG00000196141	26010	Q9NUQ6	NM_001282735	11.66273	12.77457
ENSG00000118785	6696	P10451	NM_000582	5.99887	7.024611
ENSG00000278195	6753	P32745	NM_001051	10.00652	11.29776
ENSG00000185482	246329	Q96MF2	NM_001286256	11.65177	12.09793
ENSG00000035720	26228	Q9ULZ2	NM_012108	10.05297	12.18399
ENSG00000132405	57533	Q9P2M4	NM_020773	14.29815	13.39413
ENSG00000185339	6948	P20062	NM_000355	12.38188	13.19245
ENSG00000105967	22797	O14948	NM_012252	11.15916	10.28356
ENSG00000178726	7056	P07204	NM_000361	12.76586	10.32404
ENSG00000134809	26519	P62072	NM_012456	12.56074	13.53943
ENSG00000196664	51284	Q9NYK1	NM_016562	12.18677	12.34788
ENSG00000150403	55002	Q6UWJ1	NM_001349744	12.293	11.3316
ENSG00000180061	284417	A6NC51	NM_001085488	12.68053	12.62046
ENSG00000125355	55026	Q5JRV8	NM_017938	6.812458	6.366421
ENSG00000171729	55092	Q9NW97	NM_001136216	8.236219	8.638788
ENSG00000121933	57413	P0DMS9	NM_020683	6.584684	9.559571
ENSG00000121858	8743	P50591	NM_003810	15.63676	15.72516
ENSG00000100505	114088	Q9C026	NM_015163	8.518243	6.270828
ENSG00000168026	199223	Q8NDW8	NM_145755	11.40882	11.3108
ENSG00000137267	7280	Q13885	NM_001310315	8.576143	9.398287
ENSG00000275895	102724594	P0DN76	NM_001320646	9.700893	8.662589
ENSG00000108106	27338	Q16763	NM_014501	13.28528	15.17912
ENSG00000175518	143630	Q8IYU4	NM_145053	8.108894	8.553317
ENSG00000184979	11274	Q9UMW8	NM_017414	10.87385	12.86926
ENSG00000168899	10791	O95183	NM_006634	12.55519	13.63609
ENSG00000112299	8876	O95497	NM_004666	13.35618	12.12598
ENSG00000109906	7704	Q05516	NM_006006	10.32725	9.638816
